# Supplementary material for: CD28null and Regulatory T Cells Are Substantially Disrupted in Patients with End-Stage Renal Disease Due to Diabetes Mellitus
Source: PubMed Central journal article supplement (PMC8001943; doi:10.3390/ijms22062975), 2021-03-15
Supplement: ijms-22-02975-s001.pdf [file ijms-22-02975-s001.pdf]

**Supplementary Materials**

**Supplementary Table 1.** Changes in lymphocyte subpopulations after 6 months on dialysis—subgroup analysis for nondiabetic and diabetic patients started on HD or CAPD.

|                          | Nondiabetic Patients (NDM) |                   |       |                 |                 |       |                 |                 |      |
|--------------------------|----------------------------|-------------------|-------|-----------------|-----------------|-------|-----------------|-----------------|------|
|                          | All NDM                    |                   |       | HD              |                 |       | CAPD            |                 |      |
|                          | ESRD-T0                    | ESRD-T6           | p     | ESRD-T0         | ESRD-T6         | p     | ESRD-T0         | ESRD-T6         | p    |
| WCC (K/ $\mu$ L)         | 7399 $\pm$ 2356            | 6614 $\pm$ 1687   | 0.05  | 8558 $\pm$ 2676 | 6786 $\pm$ 1867 | 0.007 | 6116 $\pm$ 1384 | 6400 $\pm$ 1483 | NS   |
| Neutrophils (K/ $\mu$ L) | 5029 $\pm$ 1824            | 3928 $\pm$ 1166   | 0.01  | 5889 $\pm$ 2403 | 3885 $\pm$ 1571 | 0.08  | 4236 $\pm$ 1126 | 3881 $\pm$ 863  | NS   |
| Neutrophils (%)          | 68.6 $\pm$ 7.2             | 62.7 $\pm$ 10.2   | 0.02  | 71.8 $\pm$ 7.2  | 60.3 $\pm$ 10.3 | 0.08  | 66 $\pm$ 6.5    | 62.8 $\pm$ 10.6 | NS   |
| Lymphocytes (K/ $\mu$ L) | 1435 $\pm$ 627             | 1648 $\pm$ 581    | 0.05  | 1581 $\pm$ 756  | 1735 $\pm$ 655  | NS    | 1300 $\pm$ 392  | 1538 $\pm$ 477  | 0.04 |
| Lymphocytes (%)          | 19.8 $\pm$ 5.8             | 25.2 $\pm$ 7.5    | 0.001 | 18.2 $\pm$ 5.4  | 25.7 $\pm$ 8.4  | 0.003 | 21.7 $\pm$ 6    | 24.6 $\pm$ 7    | NS   |
| CD3+CD4+ cells           | 693.9 $\pm$ 338            | 848.6 $\pm$ 365.6 | 0.03  | 799 $\pm$ 404   | 899 $\pm$ 404   | NS    | 619 $\pm$ 232   | 785 $\pm$ 316   | 0.02 |
| CD3+CD4+ cells (%)       | 47.9 $\pm$ 8.2             | 51 $\pm$ 8.2      | NS    | 50 $\pm$ 5.9    | 51 $\pm$ 4.9    | NS    | 47.8 $\pm$ 10.5 | 50.5 $\pm$ 11   | NS   |
| CD3+CD8+ cells           | 387 $\pm$ 240              | 420.5 $\pm$ 230   | NS    | 394 $\pm$ 296   | 422 $\pm$ 263   | NS    | 360 $\pm$ 155   | 418 $\pm$ 193   | NS   |
| CD3+CD8+ cells (%)       | 26 $\pm$ 8                 | 24.6 $\pm$ 8.3    | NS    | 23 $\pm$ 7.6    | 22 $\pm$ 7.1    | NS    | 27.4 $\pm$ 8.3  | 27 $\pm$ 9.5    | NS   |
| CD3+CD4+/CD3+CD8+        | 2.1 $\pm$ 0.9              | 2.3 $\pm$ 0.9     | NS    | 2.2 $\pm$ 0.9   | 2.4 $\pm$ 0.8   | NS    | 2 $\pm$ 0.9     | 2.2 $\pm$ 1.1   | NS   |
|                          | Diabetic Patients (DM)     |                   |       |                 |                 |       |                 |                 |      |
|                          | All DM                     |                   |       | HD              |                 |       | CAPD            |                 |      |
|                          | ESRD-T0                    | ESRD-T6           | p     | ESRD-T0         | ESRD-T6         | p     | ESRD-T0         | ESRD-T6         | p    |
| WCC (K/ $\mu$ L)         | 7600 $\pm$ 2076            | 7361 $\pm$ 2134   | NS    | 7945 $\pm$ 2373 | 7333 $\pm$ 2274 | NS    | 6822 $\pm$ 1029 | 7425 $\pm$ 2101 | NS   |
| Neutrophils (K/ $\mu$ L) | 5927 $\pm$ 1729            | 4535 $\pm$ 1731   | 0.05  | 7179 $\pm$ 1692 | 5894 $\pm$ 1755 | 0.03  | 3959 $\pm$ 363  | 3727 $\pm$ 182  | NS   |
| Neutrophils (%)          | 71 $\pm$ 10                | 66 $\pm$ 3.4      | NS    | 80.6 $\pm$ 10   | 69.7 $\pm$ 1.4  | NS    | 64 $\pm$ 15.8   | 65.7 $\pm$ 4.9  | NS   |
| Lymphocytes (K/ $\mu$ L) | 1213 $\pm$ 564             | 1646.2 $\pm$ 684  | 0.03  | 1015 $\pm$ 437  | 1617 $\pm$ 755  | 0.02  | 1657 $\pm$ 618  | 1711 $\pm$ 587  | NS   |
| Lymphocytes (%)          | 16.5 $\pm$ 7.4             | 22.2 $\pm$ 5      | 0.02  | 13.2 $\pm$ 4.9  | 22 $\pm$ 5.9    | 0.005 | 24 $\pm$ 6.9    | 22.8 $\pm$ 2    | NS   |
| CD3+CD4+ cells           | 622.7 $\pm$ 408            | 753.5 $\pm$ 320   | 0.05  | 505 $\pm$ 363   | 671 $\pm$ 304   | NS    | 885 $\pm$ 427   | 938 $\pm$ 315   | NS   |
| CD3+CD4+ cells (%)       | 47.2 $\pm$ 13.6            | 47 $\pm$ 15.3     | NS    | 45 $\pm$ 15     | 42.8 $\pm$ 14   | NS    | 52.1 $\pm$ 9.6  | 56.4 $\pm$ 15   | NS   |
| CD3+CD8+ cells           | 300 $\pm$ 147.9            | 467 $\pm$ 416     | NS    | 266 $\pm$ 130   | 516 $\pm$ 473   | 0.07  | 377 $\pm$ 176   | 356 $\pm$ 271   | NS   |
| CD3+CD8+ cells (%)       | 26.2 $\pm$ 9               | 26.2 $\pm$ 12.4   | NS    | 27.8 $\pm$ 10   | 29.2 $\pm$ 13   | NS    | 22.7 $\pm$ 5.7  | 19.4 $\pm$ 8    | NS   |

**Supplementary Table 2.** Changes in lymphocyte subpopulations after 6 months on dialysis—subgroup analysis for nondiabetic and diabetic patients started on HD or CAPD.

|                          | Nondiabetic Patients (NDM) |                   |      |                   |                 |      |                |               |      |
|--------------------------|----------------------------|-------------------|------|-------------------|-----------------|------|----------------|---------------|------|
|                          | All NDM                    |                   |      | HD                |                 |      | CAPD           |               |      |
|                          | ESRD-T0                    | ESRD-T6           | p    | ESRD-T0           | ESRD-T6         | p    | ESRD-T0        | ESRD-T6       | p    |
| CD28null cells           | 162.5 (12.6–1209)          | 155.7 (11.8–1630) | NS   | 162.5 (12.6–1209) | 170.9 (20–1630) | NS   | 190 (38–492)   | 129 (11–522)  | NS   |
| CD28null (%)             | 14.6 (1–50)                | 9.8 (0.5–53)      | NS   | 14.6 (1–50)       | 12 (1.3–53)     | NS   | 15.8 (3–34.6)  | 8.5 (0.5–37)  | NS   |
| CD4+CD28null             | 20.9 (0–550)               | 13.4 (0–810)      | NS   | 32 (0–550)        | 26.7 (0–810)    | NS   | 12.4 (1.9–164) | 10 (0–156)    | NS   |
| CD4+CD28null (%)         | 4.1 (0–42.3)               | 2.1 (0–44.8)      | NS   | 7.2 (0–42)        | 4.5 (0–44)      | NS   | 2.5 (0.3–26)   | 1.3 (0–29)    | 0.04 |
| CD8+CD28null             | 114 (12–735)               | 133 (11–820)      | NS   | 116 (12–735)      | 145 (20–820)    | NS   | 114 (36–407)   | 117 (11–366)  | NS   |
| CD8+CD28null (%)         | 43 (5.7–85)                | 41 (1.8–80)       | NS   | 45.4 (8.6–77)     | 48.8 (11–79)    | NS   | 43.4 (5.7–85)  | 39 (1.8–80)   | 0.04 |
| Natural Killer cells     | 174.6 (0–617)              | 209 (79–550)      | NS   | 175 (66–617)      | 238 (85–550)    | NS   | 118 (0–310)    | 164 (79–308)  | NS   |
| Natural Killer cells (%) | 14.6 (0–32.5)              | 14.4 (3.7–30.6)   | NS   | 17 (4.5–32.5)     | 15 (3–30.6)     | NS   | 13 (0–28)      | 10 (4.4–25)   | NS   |
| Treg cells               | 34.7 (9.9–130)             | 40.6 (6.7–110)    | NS   | 48.8 (9.9–130)    | 40.8 (6.7–89)   | NS   | 26.7 (16–107)  | 38.8 (12–110) | 0.05 |
| Treg cells (%)           | 2.8 (0.62–8.5)             | 2.5 (0.4–4.6)     | NS   | 3.2 (0.6–8.5)     | 2.5 (0.4–4.6)   | NS   | 2.6 (1.3–6.7)  | 3.1 (1–4.2)   | NS   |
| IRP                      | 2.6 ± 0.6                  | 2.8 ± 0.7         | NS   | 2.5 ± 0.6         | 2.8 ± 0.7       | 0.05 | 2.7 ± 0.6      | 2.7 ± 0.9     | NS   |
|                          | Diabetic Patients (DM)     |                   |      |                   |                 |      |                |               |      |
|                          | All DM                     |                   |      | HD                |                 |      | CAPD           |               |      |
|                          | ESRD-T0                    | ESRD-T6           | p    | ESRD-T0           | ESRD-T6         | p    | ESRD-T0        | ESRD-T6       | p    |
| CD28null cells           | 206.8 (61–500)             | 257 (98–1396)     | 0.05 | 180 (61–500)      | 299 (98–1396)   | 0.01 | 357 (136–477)  | 225 (163–601) | NS   |
| CD28null (%)             | 21.3 (4.4–34)              | 19.4 (6–41)       | NS   | 21.7 (4.4–33.8)   | 22.7 (6.3–40.7) | NS   | 19.3 (15–23)   | 17 (8.9–24)   | NS   |
| CD4+CD28null             | 34.7 (14–279)              | 52.7 (15–203)     | NS   | 30 (14–100)       | 52.7 (15–203)   | 0.02 | 61.5 (26–279)  | 52.5 (17–175) | NS   |
| CD4+CD28null (%)         | 11.5 (1.5–24)              | 7.9 (1.3–19)      | NS   | 12.5 (1.5–24)     | 11.5 (1.8–19)   | NS   | 9.8 (2.9–19.8) | 6.9 (1.3–18)  | 0.05 |
| CD8+CD28null             | 132 (47–400)               | 158 (25–1192)     | 0.05 | 130 (47–400)      | 212 (25–1192)   | 0.02 | 209 (102–378)  | 141 (103–540) | NS   |

|                          |               |               |      |                 |               |      |               |               |    |
|--------------------------|---------------|---------------|------|-----------------|---------------|------|---------------|---------------|----|
| CD8+CD28null (%)         | 61.3 (24–76)  | 63.8 (13–71)  | NS   | 62 (24–76)      | 63 (13–71)    | NS   | 59 (55–62)    | 63 (48–69)    | NS |
| Natural Killer cells     | 141 (56–460)  | 246 (70–748)  | 0.02 | 137 (56–275)    | 266 (103–456) | 0.01 | 250 (130–460) | 198 (70–748)  | NS |
| Natural Killer cells (%) | 15.3 (7.7–31) | 16.8 (3.9–35) | NS   | 14.7 (7.7–30.8) | 18 (7.5–35)   | NS   | 16 (9.7–23)   | 15.3 (3.9–30) | NS |
| Treg cells               | 33.7 (12–102) | 34.7 (20–90)  | NS   | 33.7 (12–54)    | 29.8 (20–80)  | NS   | 39.7 (17–102) | 38.3 (30–90)  | NS |
| Treg cells (%)           | 3.1 (1.1–6.7) | 2.1 (1.4–6.9) | NS   | 3.1 (2–6.7)     | 2.1 (1.4–6.2) | NS   | 2.9 (1.1–5.1) | 2.6 (1.7–5)   | NS |
| IRP                      | 2.8 ± 0.7     | 2.8 ± 0.8     | NS   | 2.8 ± 0.7       | 2.8 ± 0.6     | NS   | 2.7 ± 0.5     | 2.7 ± 1.2     | NS |
